# Supplementary material for: Nicotiana benthamiana as a Production Platform for Artemisinin Precursors
Source: PubMed Central journal article supplement (PMC2997059; doi:10.1371/journal.pone.0014222), 2010-12-03
Supplement: pone.0014222.s002.pdf [file pone.0014222.s002.pdf]

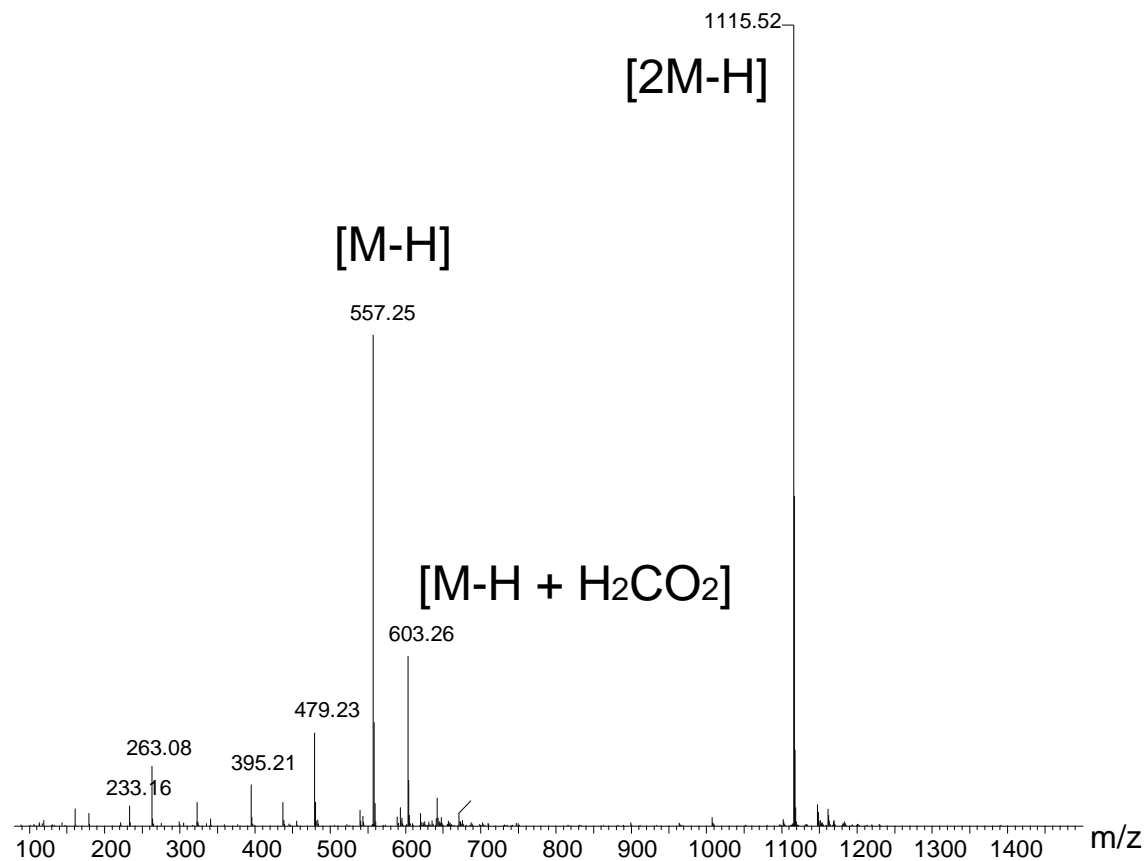

Figure S1: mass spectrum (negative mode) of artemisinin acid-12-β-diglucoside, showing a base-peak mass ([M-H]), a formic acid adduct ([M-H + H<sub>2</sub>CO<sub>2</sub>]) and a dimeric mass ([2M-H]).
