# Supplementary material for: Nicotiana benthamiana as a Production Platform for Artemisinin Precursors
Source: PubMed Central journal article supplement (PMC2997059; doi:10.1371/journal.pone.0014222), 2010-12-03
Supplement: pone.0014222.s003.pdf [file pone.0014222.s003.pdf]

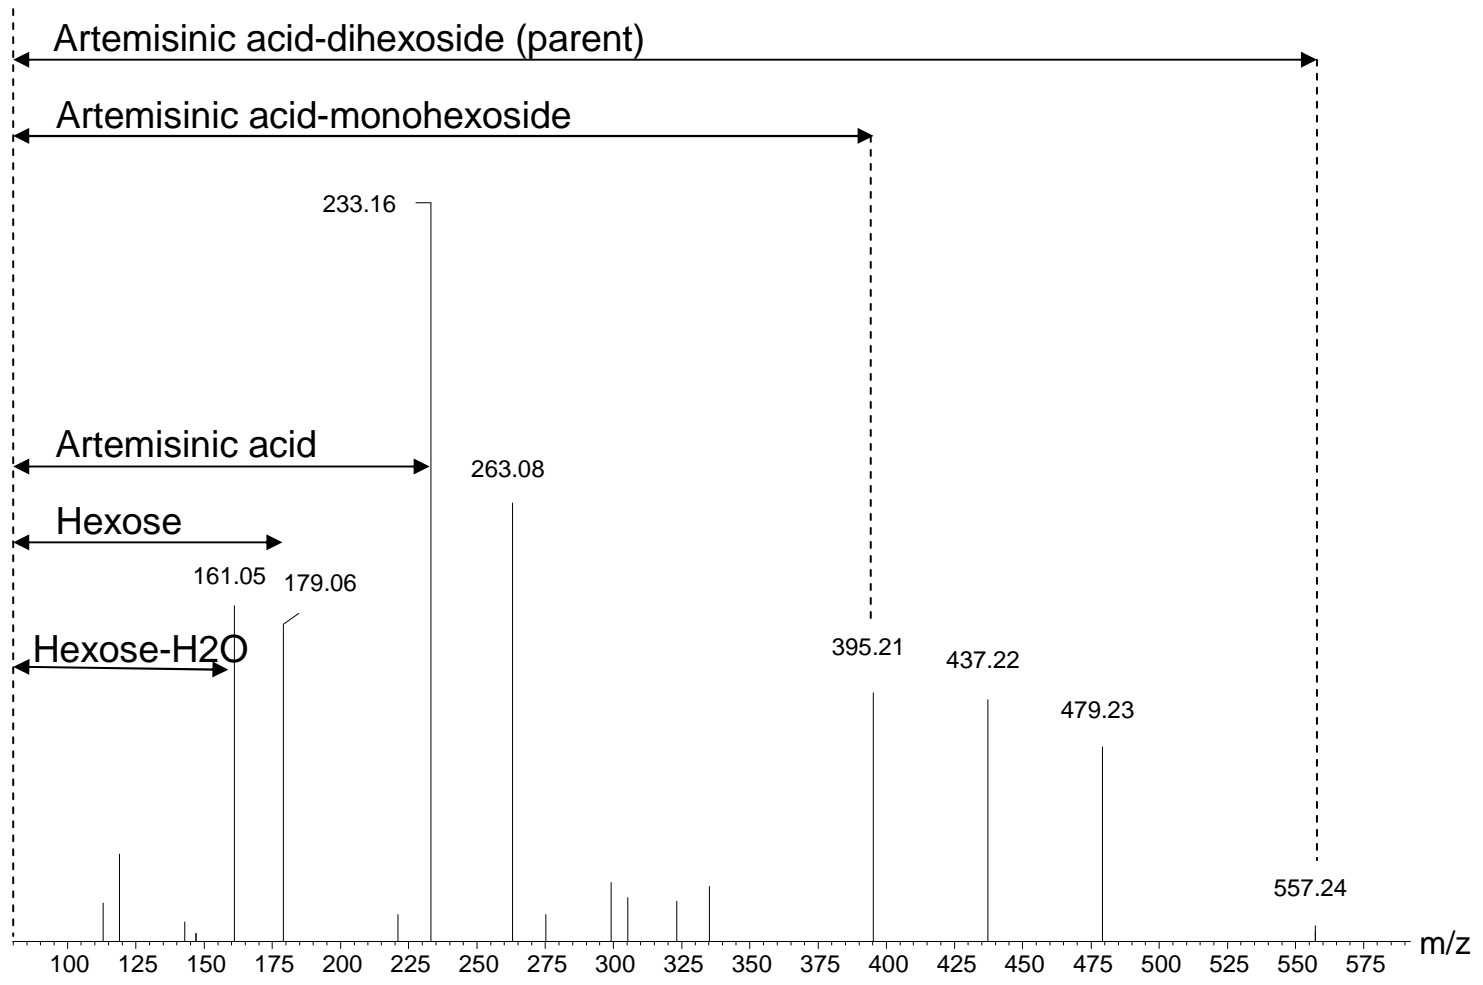

Figure S2: MSMS mass spectrum, showing collision mass fragments of artemisinin acid-12-β-diglucoside (m/z 557.24; [M-H]).
