# Supplementary material for: Nicotiana benthamiana as a Production Platform for Artemisinin Precursors
Source: PubMed Central journal article supplement (PMC2997059; doi:10.1371/journal.pone.0014222), 2010-12-03
Supplement: pone.0014222.s004.pdf [file pone.0014222.s004.pdf]

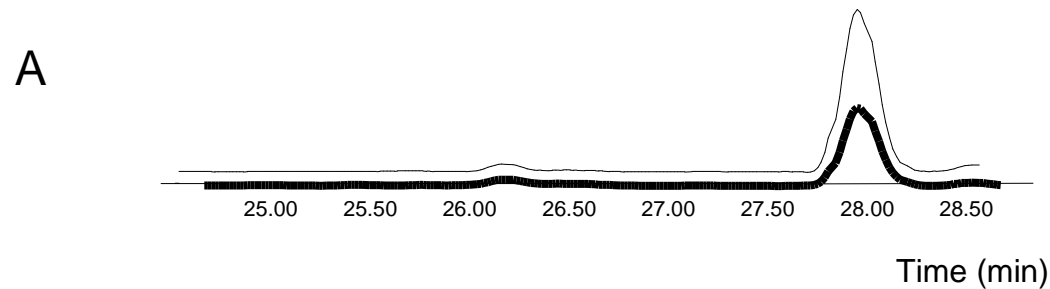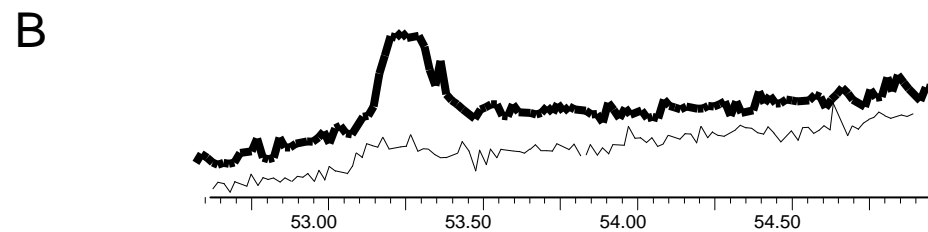

**Figure S3:** The effect of  $\beta$ -glucosidase on artemisinic acid-12- $\beta$ -diglucoside. (A) Total ion count mass chromatograms and (B) chromatograms at  $m/z = 791.5$ . Represented are chromatograms of artemisinic acid-12- $\beta$ -diglucoside treated with control (thin line) or  $\beta$ -glucosidase (bold line). The peak at  $R_t = 28.0$  min represents artemisinic acid-12- $\beta$ -diglucoside, the peak at  $R_t = 53.2$  min represents artemisinic acid monoglucoside.
