# Supplementary material for: Nicotiana benthamiana as a Production Platform for Artemisinin Precursors
Source: PubMed Central journal article supplement (PMC2997059; doi:10.1371/journal.pone.0014222), 2010-12-03
Supplement: pone.0014222.s005.pdf [file pone.0014222.s005.pdf]

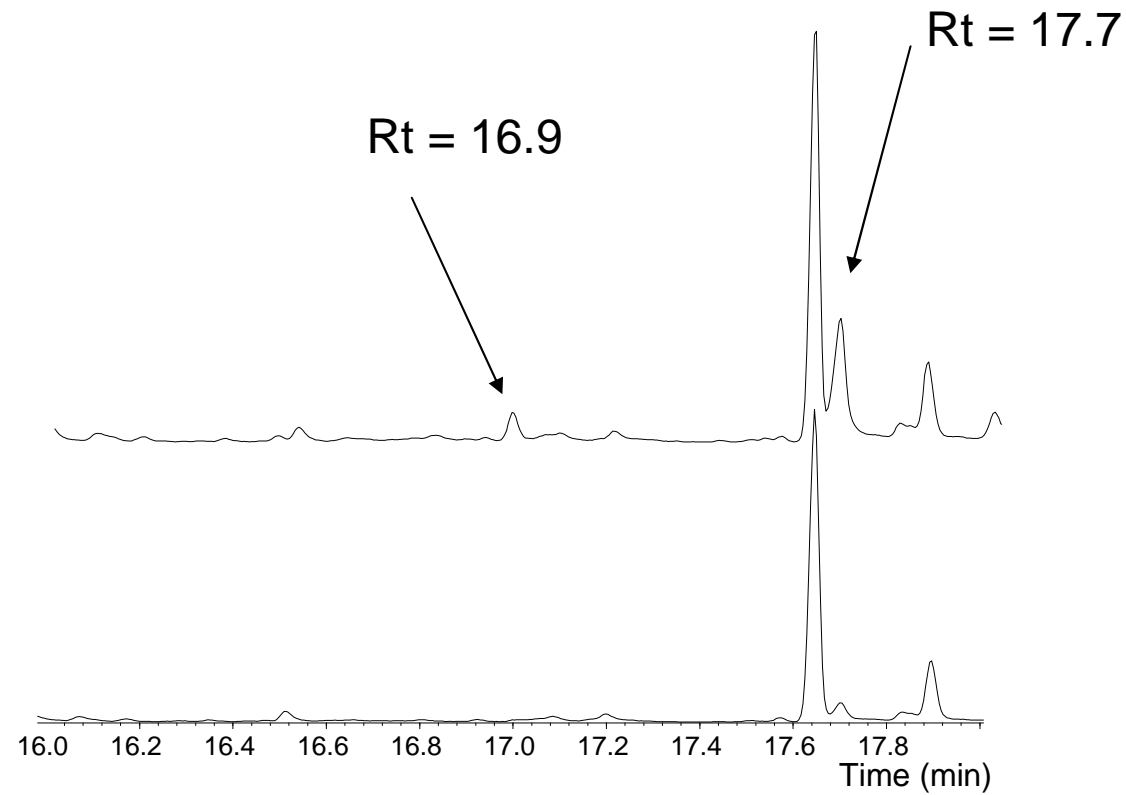

Figure S4 GC-MS chromatogram (total ion count) of viscozym-treated extracts of *N. benthamiana* leaves infiltrated with 35S-mAmFH-2A (bottom) or with 35S-mAmFH-2A + 35S-CYP71AV1 (top). Indicated peaks have been further analyzed.
