# Supplementary material for: Nicotiana benthamiana as a Production Platform for Artemisinin Precursors
Source: PubMed Central journal article supplement (PMC2997059; doi:10.1371/journal.pone.0014222), 2010-12-03
Supplement: pone.0014222.s006.pdf [file pone.0014222.s006.pdf]

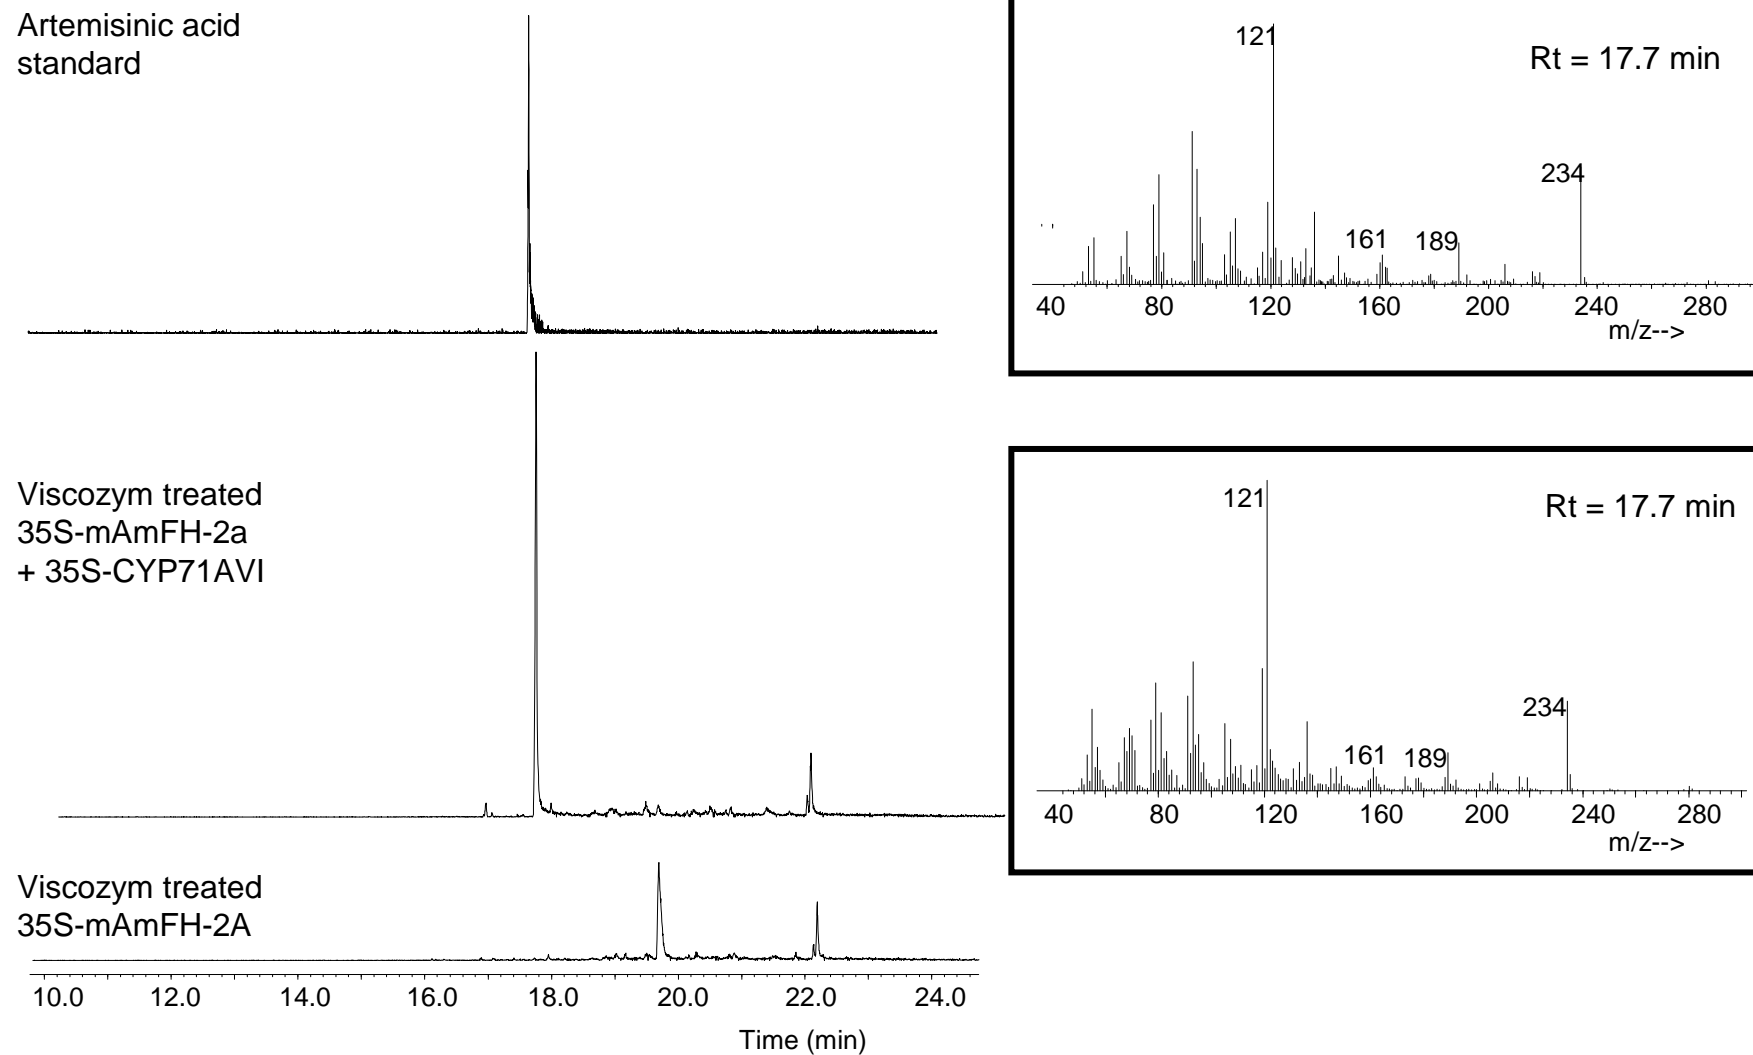

Figure S5 GC-MS chromatogram (m/z 234) of viscozym-treated extracts of *N. benthamiana* leaves infiltrated with 35S-mAmFH-2A (bottom), with 35S-mAmFH-2A + 35S-CYP71AV1 (middle), or artemisinin acid standard (top). Mass spectra of artemisinin acid and the artemisinin acid produced in tobacco are shown.
